# Supplementary material
Source: PubMed Central journal article supplement (PMC4094111)
Supplement: NIHMS559222-supplement-supplemental_material.pdf [file NIHMS559222-supplement-supplemental_material.pdf]

**Supplemental Material**

Supplemental Table 1: AHA/ACSM Preparticipation Questionnaire (AAPQ)

| <b>Assess your health status by marking all TRUE statements</b>                                                                                                                                                                                                                                                                                                                                                                                                                                                                                                                                                                                                                                                                                                                                                                                                                                                                                                                                                                                                                                                                                                                                                                                                                                                                                                                                                                                 |                                                                                                                                                                                                                                                                                                                  |
|-------------------------------------------------------------------------------------------------------------------------------------------------------------------------------------------------------------------------------------------------------------------------------------------------------------------------------------------------------------------------------------------------------------------------------------------------------------------------------------------------------------------------------------------------------------------------------------------------------------------------------------------------------------------------------------------------------------------------------------------------------------------------------------------------------------------------------------------------------------------------------------------------------------------------------------------------------------------------------------------------------------------------------------------------------------------------------------------------------------------------------------------------------------------------------------------------------------------------------------------------------------------------------------------------------------------------------------------------------------------------------------------------------------------------------------------------|------------------------------------------------------------------------------------------------------------------------------------------------------------------------------------------------------------------------------------------------------------------------------------------------------------------|
| <p><b>History</b><br/>           You have had:<br/> <input type="checkbox"/> a heart attack<br/> <input type="checkbox"/> heart surgery<br/> <input type="checkbox"/> cardiac catheterization<br/> <input type="checkbox"/> coronary angioplasty (PTCA)<br/> <input type="checkbox"/> pacemaker/implantable cardiac defibrillator/rhythm disturbance<br/> <input type="checkbox"/> heart valve disease<br/> <input type="checkbox"/> heart failure<br/> <input type="checkbox"/> heart transplantation<br/> <input type="checkbox"/> congenital heart disease</p> <p><b>Symptoms</b><br/> <input type="checkbox"/> You experience chest discomfort with exertion<br/> <input type="checkbox"/> You experience unreasonable breathlessness<br/> <input type="checkbox"/> You experience dizziness, fainting, or blackouts<br/> <input type="checkbox"/> You take heart medications</p> <p><b>Other health issues</b><br/> <input type="checkbox"/> You have diabetes<br/> <input type="checkbox"/> You have asthma or other lung disease<br/> <input type="checkbox"/> You have burning or cramping in lower legs when walking short distances<br/> <input type="checkbox"/> You have musculoskeletal problems that limit your physical activity<br/> <input type="checkbox"/> You have concerns about the safety of exercise<br/> <input type="checkbox"/> You take prescription medications<br/> <input type="checkbox"/> You are pregnant</p> | <p><i>If you marked any of these statements in this section, consult your physician or other appropriate health care provider before engaging in exercise. You may need to use a facility with a <b>medically qualified staff</b></i></p>                                                                        |
| <p><b>Cardiovascular risk factors</b><br/> <input type="checkbox"/> You are a man older than 45 years<br/> <input type="checkbox"/> You are a woman older than 55 years, have had a hysterectomy, or are postmenopausal<br/> <input type="checkbox"/> You smoke, or quit smoking within the previous 6 months<br/> <input type="checkbox"/> Your blood pressure is &gt; 140/90 mm Hg<br/> <input type="checkbox"/> You do not know your blood pressure<br/> <input type="checkbox"/> You take blood pressure medication<br/> <input type="checkbox"/> Your blood cholesterol is &gt; 200mg/dL<br/> <input type="checkbox"/> You do not know your cholesterol level<br/> <input type="checkbox"/> You have a close blood relative who had a heart attack or heart surgery before age 55 (father or brother) or age 65 (mother or sister)<br/> <input type="checkbox"/> You are physically inactive (i.e., you get &lt;30 minutes of physical activity on at least 3 days per week)<br/> <input type="checkbox"/> You are &gt;20 lbs overweight</p>                                                                                                                                                                                                                                                                                                                                                                                               | <p><i>If you marked two or more of the statements in this section you should consult your physician or other appropriate health care provider before engaging in exercise. You might benefit from using a facility with a <b>professionally qualified exercise staff†</b> to guide your exercise program</i></p> |
| <p><input type="checkbox"/> None of the above</p>                                                                                                                                                                                                                                                                                                                                                                                                                                                                                                                                                                                                                                                                                                                                                                                                                                                                                                                                                                                                                                                                                                                                                                                                                                                                                                                                                                                               | <p><i>You should be able to exercise safely without consulting your physician or other appropriate health care provider in a self-guided program or almost any</i></p>                                                                                                                                           |

*facility that meets your exercise program needs.*

Adapted from ACSM Guidelines for Exercise Testing and Prescription, 8<sup>th</sup> Edition<sup>4</sup>

†Professionally qualified exercise staff refers to appropriately trained individuals who possess academic training, practical and clinical knowledge, skills, and abilities commensurate with the credentials defined in appendix F of the Guidelines for Exercise Testing and Prescription<sup>4</sup>

Supplemental Table 2: Items from the AAPQ and their corresponding items from NHANES 2001-2004.

| <b>AAPQ ITEM</b>                                 |                       |                        |                                                                                                                                    |
|--------------------------------------------------|-----------------------|------------------------|------------------------------------------------------------------------------------------------------------------------------------|
| <b>HISTORY (you have had:)</b>                   | <b>NHANES SECTION</b> | <b>NHANES VARIABLE</b> | <b>NHANES TEXT</b>                                                                                                                 |
| Heart attack                                     | MCQ                   | MCQ160E                | Has a doctor or other health professional ever told you that you had a heart attack (aka MI)?                                      |
| Heart surgery                                    | MCQ                   | MCQ160C                | Has a doctor or other health professional ever told you that you had coronary heart disease?                                       |
| Cardiac catheterization                          |                       |                        |                                                                                                                                    |
| Coronary angioplasty (PTCA)                      |                       |                        |                                                                                                                                    |
| Pacemaker/ICD/Rhythm disturbance                 | n/a                   | n/a                    | Likely captured with meds (antiarrhythmics)                                                                                        |
| Heart valve disease                              | n/a                   | n/a                    | Likely captured with meds (anticoagulants)                                                                                         |
| Heart failure                                    | MCQ                   | MCQ160B                | Has a doctor or other health professional ever told you that you had congestive heart failure?                                     |
| Heart transplantation                            | n/a                   | n/a                    | Likely captured under CHD, CHF, medication use                                                                                     |
| Congenital heart disease                         | n/a                   | n/a                    | Likely captured with meds                                                                                                          |
| <b>Symptoms</b>                                  | <b>SECTION</b>        | <b>VARIABLE</b>        | <b>TEXT</b>                                                                                                                        |
| You experience chest discomfort with exertion    | CDQ                   | CDQ0001                | Ever had pain or discomfort in chest?                                                                                              |
|                                                  |                       | CDQ0002                | Do you get it (per 0001) when you walk uphill or in a hurry?                                                                       |
|                                                  |                       | CDQ0003                | Do you get it (per0001) when you walk at an ordinary pace on level ground?                                                         |
| You experience unreasonable breathlessness       | CDQ                   | CDQ010                 | Have you had shortness of breath either when hurrying on the level or walking up a slight hill?                                    |
| You experience dizziness, fainting, or blackouts | BAQ                   | BAQ010                 | During the past 12 months, have you had dizziness, difficulty with balance, or difficulty with falling?                            |
| You take heart medications                       | RXQ_RX                | RXDDRGID               | Multum first level class 40 (CVD) or 81 (Coagulation modifiers)                                                                    |
| <b>Other Health Issues</b>                       | <b>SECTION</b>        | <b>VARIABLE</b>        | <b>TEXT</b>                                                                                                                        |
| You have diabetes                                | DIQ                   | DIQ010                 | (Other than during pregnancy) have you ever been told by a doctor or health professional that you have diabetes or sugar diabetes? |
| You have asthma or other lung disease            | MCQ                   | MCQ010                 | Has a doctor or other health professional ever told you that you had asthma?                                                       |
|                                                  |                       | MCQ160G                | Has a doctor or other health professional ever told you that you had emphysema?                                                    |
|                                                  |                       | MCQ160K                | Has a doctor or other health professional ever told you that you had chronic bronchitis                                            |

|                                                                         |     |                  |                                                                                              |
|-------------------------------------------------------------------------|-----|------------------|----------------------------------------------------------------------------------------------|
| You have burning or cramping in lower legs when walking short distances | DIQ | DIQ140           | Do you ever get pain in either leg while walking? (>40y old)                                 |
| You have musculoskeletal problems that limit your physical activity     | MCQ | MCQ160A          | Has a doctor or other health professional ever told you that you had arthritis?              |
|                                                                         | OSQ | OSQ060           | Has a doctor ever told you that you had osteoporosis, sometimes called thin or brittle bones |
| You have concerns about the safety of exercise                          | n/a | n/a              | Not assessed in NHANES                                                                       |
| You take prescription medications                                       | RXQ | RXD030 or RXDUSE | In the past month, have you used or taken medication for which a prescription is needed?     |
| You are pregnant                                                        | RHQ | RHQ140           | Do you think that you are pregnant now?                                                      |
|                                                                         |     | RHQ141           | Do you think that you are pregnant now?                                                      |
|                                                                         |     | RHD143           | Are you pregnant now?                                                                        |

| <b>Cardiovascular risk factors</b>                                                  | <b>SECTION</b> | <b>VARIABLE</b> | <b>TEXT</b>                                                                                                                  |
|-------------------------------------------------------------------------------------|----------------|-----------------|------------------------------------------------------------------------------------------------------------------------------|
| You are a man older than 45 years                                                   | DEMO           | RIDAGEYR        | Age in years                                                                                                                 |
|                                                                                     |                | RIAGENDR        | Gender                                                                                                                       |
| You are a woman older than 55 years, have had a hysterectomy, or are postmenopausal | DEMO           | RIDAGEYR        | Age in years                                                                                                                 |
|                                                                                     |                | RIAGENDR        | Gender                                                                                                                       |
|                                                                                     | RHQ            | RHD280          | Have you had a hysterectomy including a partial hysterectomy, that is, surgery to remove your uterus or womb? (F20-150y)     |
|                                                                                     |                | RHQ040          | What is the reason you have not had regular periods in the past 12 months? (ans 5, going-gone through menopause)             |
| You smoke, or quit smoking within the previous 6 months                             | SMQ            | SMQ020          | Have you smoked at least 100 cigarettes in your entire life?                                                                 |
|                                                                                     |                | SMQ040          | Do you now smoke cigarettes?                                                                                                 |
|                                                                                     |                | SMQ050Q         | How long has it been since you stopped smoking cigarettes? (+SMQ050U for unit)                                               |
|                                                                                     |                | SMQ120          | Have you smoked a pipe at least 20 times in your entire life?                                                                |
|                                                                                     |                | SMQ140          | Do you now smoke a pipe?                                                                                                     |
|                                                                                     |                | SMQ150          | Have you smoked a cigar at least 20 times in your entire life?                                                               |
|                                                                                     |                | SMQ170          | Do you now smoke cigars?                                                                                                     |
|                                                                                     |                | SMQ170          | Do you now smoke cigars?                                                                                                     |
| Your blood pressure is > 140/90 mm Hg                                               | BPQ            | BPQ020          | Have you ever been told by a doctor or other health professional that you had hypertension, also called high blood pressure? |

|                                                                                                                                         |        |          |                                                                                                                                                                                                                                        |
|-----------------------------------------------------------------------------------------------------------------------------------------|--------|----------|----------------------------------------------------------------------------------------------------------------------------------------------------------------------------------------------------------------------------------------|
| You do not know your blood pressure                                                                                                     | BPQ    | BPQ010   | About how long has it been since you last had your blood pressure taken by a doctor or other health professional?                                                                                                                      |
| You take blood pressure medication                                                                                                      | BPQ    | BPQ040A  | Because of your hypertension/HBP, have you ever been told to take prescribed medicine?                                                                                                                                                 |
|                                                                                                                                         | RXQ_RX | RXDDRGID | Multum first level class ID 40 (CVD) and second class 41-44, 47-49, 52-56                                                                                                                                                              |
| Your blood cholesterol is > 200mg/dL                                                                                                    | BPQ    | BPQ080   | Have you ever been told by a doctor or other health professional that your blood cholesterol was high?                                                                                                                                 |
| You do not know your cholesterol level                                                                                                  | BPQ    | BPQ060   | Ever had blood cholesterol checked?                                                                                                                                                                                                    |
|                                                                                                                                         |        | BPQ070   | About how long has it been since you last had your blood cholesterol checked?                                                                                                                                                          |
| You have a close blood relative that had a heart attack or heart surgery before age 55 (father or brother) or age 65 (mother or sister) | MCQ    | MCQ250G  | Including living and deceased, were any of your biological that is, blood relatives including grandparents, parents, brothers, sisters ever told by a health professional that they had a heart attack or angina before the age of 50? |
| You are physically inactive (i.e., you get <30minutes of physical activity on at least 3 days per week)                                 | PAQ    | Various  | Physical activity questionnaire with individual activities                                                                                                                                                                             |
| You are >20 lbs overweight                                                                                                              | WHQ    | WHD010   | How tall are you without shoes?                                                                                                                                                                                                        |
|                                                                                                                                         |        | WHD020   | How much do you weigh without clothes or shoes?                                                                                                                                                                                        |

Supplemental Table 3: PAR-Q items and their corresponding NHANES items

| PARQ # and prompt                                                                                                                        | NHANES SECTION | NHANES VARIABLE | NHANES TEXT                                                                                               |
|------------------------------------------------------------------------------------------------------------------------------------------|----------------|-----------------|-----------------------------------------------------------------------------------------------------------|
| (Instructions) If you are over 69 years of age and you are not used to being very active, check with your doctor                         | DEMO           | RIDAGEYR        | Age in years at screening                                                                                 |
| 1. Has your doctor ever said that you have a heart condition <u>and...</u>                                                               | PAQ            | Various         | Physical activity questionnaire with individual activities,                                               |
|                                                                                                                                          | MCQ            | MCQ160B         | Has a doctor or other health professional ever told you that you had congestive heart failure?            |
|                                                                                                                                          |                | MCQ160C         | Has a doctor or other health professional ever told you that you had coronary heart disease?              |
|                                                                                                                                          |                | MCQ160E         | Has a doctor or other health professional ever told you that you had a heart attack (aka MI)?             |
|                                                                                                                                          |                | MCQ160D         | Has a doctor or other health professional ever told you that you had angina, also called angina pectoris? |
| ...that you should only do physical activity recommended by a doctor                                                                     | n/a            | n/a             | n/a                                                                                                       |
| 2. Do you feel pain in your chest when you do physical activity?                                                                         | CDQ            | CDQ0001         | Ever had pain or discomfort in chest?                                                                     |
|                                                                                                                                          |                | CDQ0002         | Do you get it (per 0001) when you walk uphill or in a hurry?                                              |
|                                                                                                                                          |                | CDQ0003         | Do you get it (per0001) when you walk at an ordinary pace on level ground?                                |
| 3. In the past month, have you had chest pain when you were not doing physical activity? (not temporally matched)                        | CDQ            | CDQ0001         | Ever had pain or discomfort in chest?                                                                     |
| 4. Do you lose your balance because of dizziness or do you ever lose consciousness?                                                      | BAQ            | BAQ010          | During the past 12 months, have you had dizziness, difficulty with balance, or difficulty with falling?   |
| 5. Do you have a bone or joint problem (for example, back, knee, or hip) that could be made worse by a change in your physical activity? | MCQ            | MCQ160A         | Has a doctor or other health professional ever told you that you had arthritis?                           |
|                                                                                                                                          | OSQ            | OSQ060          | Has a doctor ever told you that you had osteoporosis, sometimes called thin or brittle bones              |

|                                                                                                                      |        |          |                                                                 |
|----------------------------------------------------------------------------------------------------------------------|--------|----------|-----------------------------------------------------------------|
| 6. Is your doctor currently prescribing drugs (for example, water pills) for your blood pressure or heart condition? | RXQ_RX | RXDDRGID | Multum first level class 40 (CVD) or 81 (Coagulation modifiers) |
| 7. Do you know of <u>any other reason</u> why you should not do physical activity?                                   | n/a    | n/a      | n/a                                                             |
